# Supplementary material for: M1 macrophage infiltration exacerbate muscle/bone atrophy after peripheral nerve injury
Source: PubMed Central journal article supplement (PMC6971979; doi:10.1186/s12891-020-3069-z), 2020-01-20
Supplement: 12891_2020_3069_MOESM1_ESM.pdf [file 12891_2020_3069_MOESM1_ESM.pdf]

The numeric results of muscle weight measurement

| Muscle Weight<br>(mg) |                | Median | IQR     | Range   |
|-----------------------|----------------|--------|---------|---------|
| Control               | Biceps femoris | 237    | 180-250 | 160-260 |
|                       | Gastrocnemius  | 197    | 176-216 | 160-233 |
| CCI                   | Biceps femoris | 110    | 101-151 | 80-189  |
|                       | Gastrocnemius  | 100    | 79-131  | 64-160  |
| MF depletion          | Biceps femoris | 216    | 177-223 | 161-230 |
|                       | Gastrocnemius  | 236    | 197-260 | 189-264 |
| Dexamethasone         | Biceps femoris | 278    | 238-297 | 213-331 |
|                       | Gastrocnemius  | 245    | 232-285 | 192-291 |
| Pregabalin            | Biceps femoris | 193    | 162-202 | 108-212 |
|                       | Gastrocnemius  | 196    | 126-216 | 88-244  |
| Loxoprofen            | Biceps femoris | 190    | 156-228 | 125-261 |
|                       | Gastrocnemius  | 173    | 109-233 | 93-267  |

IQR, inter quartile range; CCI, chronic constriction injury; MF, macrophage.

The numeric results of total bone density measurement (control, CCI, macrophage depletion)

| Total bone density<br>(mg/cm <sup>3</sup> ) |       |        | 0w      | 1w      | 2w      | 3w      | 4w      | 5w      |
|---------------------------------------------|-------|--------|---------|---------|---------|---------|---------|---------|
| control                                     | femur | median | 489     | 518     | 489     | 475     | 507     | 463     |
|                                             |       | IQR    | 448-531 | 438-643 | 445-629 | 447-520 | 465-567 | 438-541 |
|                                             |       | range  | 325-765 | 350-756 | 312-667 | 431-611 | 350-612 | 399-672 |
|                                             | tibia | median | 635     | 646     | 617     | 661     | 663     | 632     |
|                                             |       | IQR    | 567-720 | 589-721 | 547-713 | 535-727 | 529-718 | 516-702 |
|                                             |       | range  | 304-889 | 338-783 | 384-881 | 298-892 | 308-879 | 388-892 |
| CCI                                         | femur | median | 489     | 481     | 391     | 388     | 410     | 393     |
|                                             |       | IQR    | 430-593 | 429-561 | 353-474 | 372-421 | 389-457 | 383-434 |
|                                             |       | range  | 350-644 | 370-637 | 264-503 | 355-473 | 358-479 | 359-479 |
|                                             | tibia | median | 605     | 614     | 542     | 555     | 550     | 528     |
|                                             |       | IQR    | 590-670 | 579-678 | 530-559 | 519-572 | 541-576 | 520-545 |
|                                             |       | range  | 320-783 | 349-798 | 254-796 | 254-753 | 269-732 | 266-737 |
| MF depletion                                | femur | median | 499     | 497     | 482     | -       | -       | -       |
|                                             |       | IQR    | 424-517 | 458-514 | 456-511 | -       | -       | -       |
|                                             |       | range  | 309-647 | 287-632 | 355-644 | -       | -       | -       |
|                                             | tibia | median | 617     | 626     | 595     | -       | -       | -       |
|                                             |       | IQR    | 597-639 | 613-655 | 556-632 | -       | -       | -       |
|                                             |       | range  | 270-871 | 318-865 | 329-797 | -       | -       | -       |

IQR: inter quartile range, CCI: chronic constriction injury, MF: macrophage

The numeric results of total bone density measurement (drug administration groups)

| Total bone density<br>(mg/cm <sup>3</sup> ) |       |        | 0w      | 1w      | 2w      | 3w      | 4w | 5w |
|---------------------------------------------|-------|--------|---------|---------|---------|---------|----|----|
| Dexamethasone                               | femur | median | 479     | 472     | 469     | 461     | -  | -  |
|                                             |       | IQR    | 458-504 | 452-519 | 456-480 | 417-478 | -  | -  |
|                                             |       | range  | 348-642 | 335-685 | 345-619 | 321-619 | -  | -  |
|                                             | tibia | median | 602     | 618     | 612     | 602     | -  | -  |
|                                             |       | IQR    | 588-680 | 613-672 | 599-674 | 580-677 | -  | -  |
|                                             |       | range  | 309-832 | 293-822 | 275-825 | 232-827 | -  | -  |
| Pregabalin                                  | femur | median | 500     | 478     | 456     | 463     | -  | -  |
|                                             |       | IQR    | 455-522 | 456-492 | 440-477 | 437-473 | -  | -  |
|                                             |       | range  | 332-676 | 313-662 | 317-628 | 332-476 | -  | -  |
|                                             | tibia | median | 597     | 608     | 611     | 606     | -  | -  |
|                                             |       | IQR    | 579-601 | 541-618 | 587-626 | 590-631 | -  | -  |
|                                             |       | range  | 333-785 | 285-822 | 270-807 | 266-845 | -  | -  |
| Loxoprofen                                  | femur | median | 488     | 453     | 437     | 428     | -  | -  |
|                                             |       | IQR    | 448-531 | 399-511 | 408-474 | 405-469 | -  | -  |
|                                             |       | range  | 329-670 | 301-666 | 282-611 | 295-612 | -  | -  |
|                                             | tibia | median | 592     | 612     | 597     | 581     | -  | -  |
|                                             |       | IQR    | 556-613 | 572-627 | 579-628 | 511-625 | -  | -  |
|                                             |       | range  | 322-782 | 294-832 | 249-853 | 255-829 | -  | -  |

IQR: inter quartile range

The numeric results of immunohistochemistry of femur

| Osteoclasts<br>(number/mm <sup>2</sup> ) | median | IQR   | range |
|------------------------------------------|--------|-------|-------|
| control                                  | 34     | 15-44 | 4-67  |
| CCI                                      | 65     | 37-82 | 33-90 |
| MF depletion                             | 20     | 11-52 | 6-82  |
| Dexamethasone                            | 13     | 11-39 | 9-59  |
| Pregabalin                               | 23     | 20-34 | 19-41 |
| Loxoprofen                               | 21     | 19-38 | 18-50 |
| Neurotrophin                             | 64     | 53-75 | 43-91 |
| Amitriptyline                            | 64     | 51-66 | 33-79 |

IQR: inter quartile range, CCI: chronic constriction injury, MF: macrophage

The numeric results of flow cytometry

| M1 macrophage<br>( $\times 10^5$ number/muscle) |                | median | IQR      | range    |
|-------------------------------------------------|----------------|--------|----------|----------|
| control                                         | biceps femoris | 3.1    | 2.0-4.0  | 1.7-4.9  |
|                                                 | gastrocnemius  | 0.7    | 3.0-1.1  | 0.2-1.5  |
| CCI                                             | biceps femoris | 8.9    | 7.6-11.6 | 5.8-13.9 |
|                                                 | gastrocnemius  | 1.1    | 1.1-2.4  | 0.7-3.5  |
| MF depletion                                    | biceps femoris | 0.8    | 0.5-1.4  | 0.5-1.8  |
|                                                 | gastrocnemius  | 0.4    | 0.1-0.5  | 0.1-0.5  |
| Dexamethasone                                   | biceps femoris | 2.9    | 2.2-4.4  | 1.8-4.7  |
|                                                 | gastrocnemius  | 0.7    | 0.4-1.0  | 0.3-1.5  |
| Pregabalin                                      | biceps femoris | 3.7    | 3.1-7.2  | 2.8-9.5  |
|                                                 | gastrocnemius  | 1.4    | 1.0-1.8  | 0.6-3.2  |
| Loxoprofen                                      | biceps femoris | 3.9    | 3.5-6.5  | 2.2-9.9  |
|                                                 | gastrocnemius  | 1.2    | 1.0-1.6  | 1.0-2.1  |
| Neurotrophin                                    | biceps femoris | 7.5    | 6.7-9.1  | 4.5-11.9 |
|                                                 | gastrocnemius  | 2.4    | 1.1-2.7  | 1.1-4.2  |
| Amitriptyline                                   | biceps femoris | 7.9    | 7.0-12.2 | 6.8-17.6 |
|                                                 | gastrocnemius  | 2.8    | 2.3-3.1  | 1.8-3.6  |

IQR: inter quartile range, CCI: chronic constriction injury, MF: macrophage

The numeric results of reverse transcription polymerase chain reaction

| mRNA relative expression |                |       | TNF $\alpha$ | IL-1 $\beta$ | CCL2    | CCR2    |
|--------------------------|----------------|-------|--------------|--------------|---------|---------|
| CCI                      | Biceps femoris | mean  | 6.1          | 3.8          | 2.6     | 3.3     |
|                          |                | SD    | 0.5          | 0.5          | 0.3     | 0.4     |
|                          |                | range | 5.4-6.9      | 3.0-4.3      | 2.3-3.2 | 2.6-3.8 |
|                          | gastrocnemius  | mean  | 2.5          | 2.9          | 2.4     | 2.3     |
|                          |                | SD    | 0.3          | 0.8          | 0.3     | 0.3     |
|                          |                | range | 2.1-3.1      | 2.1-3.7      | 2.1-3.0 | 2.0-2.8 |

CCI: chronic constriction injury, TNF $\alpha$ : tumor necrosis factor- $\alpha$ ,

IL-1 $\beta$ : interleukin-1 $\beta$ , CCL2: chemokine (C-C motif) ligand2

CCR2: C-C chemokine receptor type2
